# Supplementary material
Source: Royal Society of Chemistry journal article supplement (doi:10.1039/d6nr00899b)
Supplement: d6nr00899b1.pdf [file d6nr00899b1.pdf]

**Supporting Information**

for

**Boosting OER via Metal-Support Interaction and H-Bond Network: Amorphous RuO<sub>x</sub> on Fluorinated Ruddlesden-Popper Perovskite**

*Ziye Feng<sup>a</sup>, Zijie Peng<sup>a</sup>, Yang Xu<sup>b</sup>, Ming Zhang<sup>c, d</sup>, Junfang Cheng<sup>a\*</sup>*

<sup>a</sup>SJTU Paris Elite Institute of Technology, Shanghai Jiao Tong University, Shanghai 200240, China

<sup>b</sup>School of Mechanical Engineering, Shanghai Jiao Tong University, Shanghai 200240, China

<sup>c</sup>CAS Key Laboratory of Design and Assembly of Functional Nanostructures, and Fujian Key Laboratory of Nanomaterials, Fujian Institute of Research on the Structure of Matter, Chinese Academy of Sciences, Fuzhou 350002, China

<sup>d</sup>Xiamen Key Laboratory of Rare Earth Photoelectric Functional Materials, Xiamen Institute of Rare Earth Materials, Haixi Institutes, Chinese Academy of Sciences, Xiamen 361021, China

\***E-mail:** chengjunfang@sjtu.edu.cn

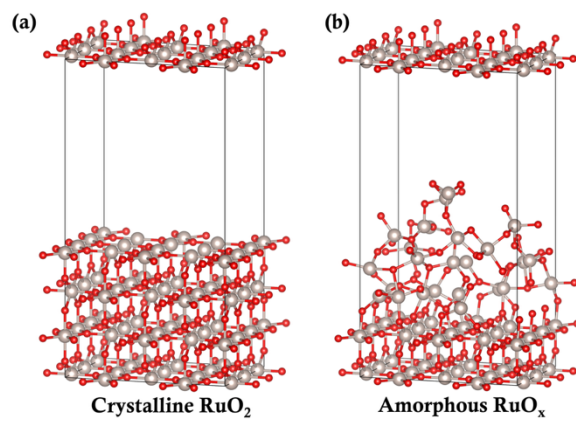

**Figure S1.** Optimized atomic models of (a) crystalline  $\text{RuO}_2$  and (b) amorphous  $\text{RuO}_x$ ; gray spheres denote Ru atoms, and red spheres denote O atoms.

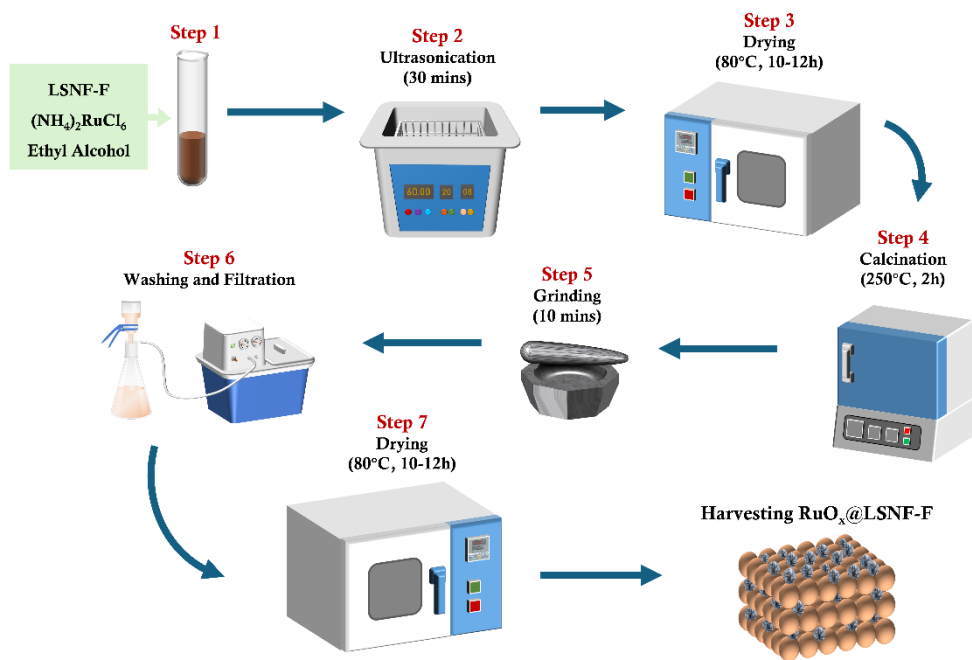

**Figure S2.** Schematic diagram of the synthesis process of RuO<sub>x</sub>@LSNF-F.

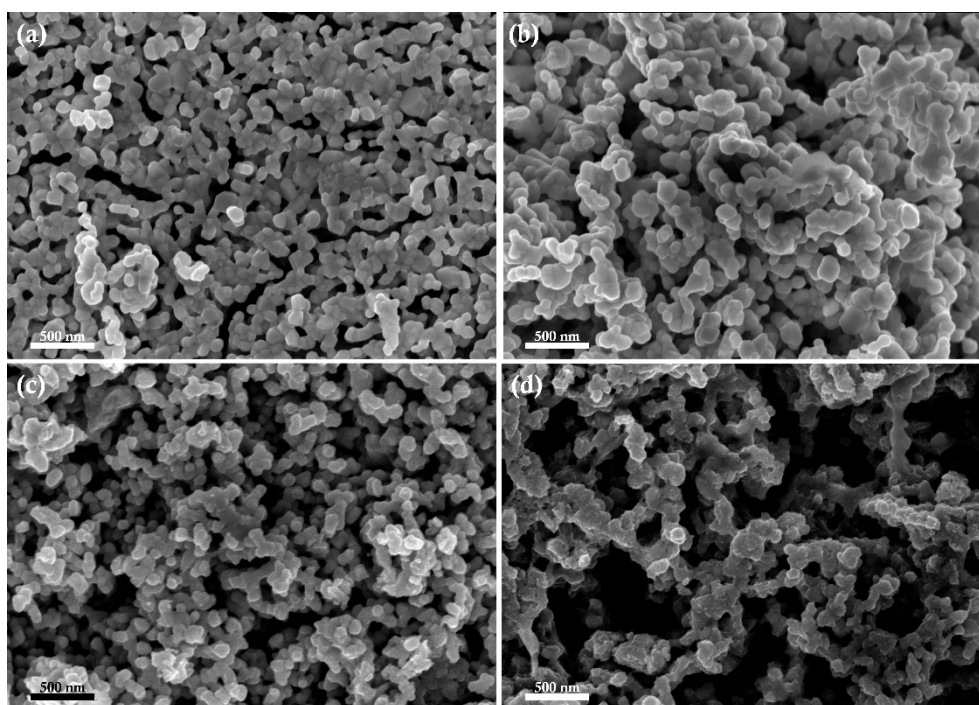

**Figure S3.** SEM image of (a) LSNF; (b) LSNF-F; (c) RuO<sub>x</sub>@LSNF; (d) RuO<sub>x</sub>@LSNF-F.

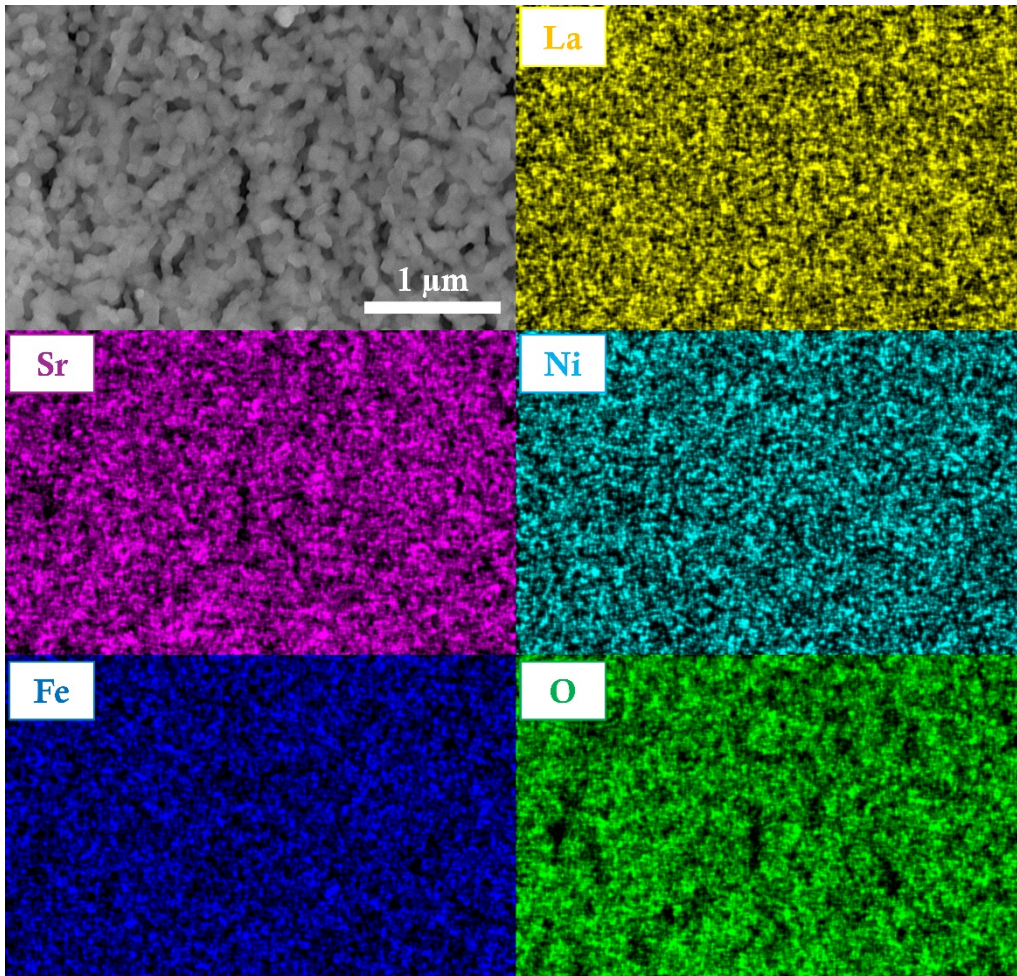

Figure S4. SEM-EDS mapping of LSNF.

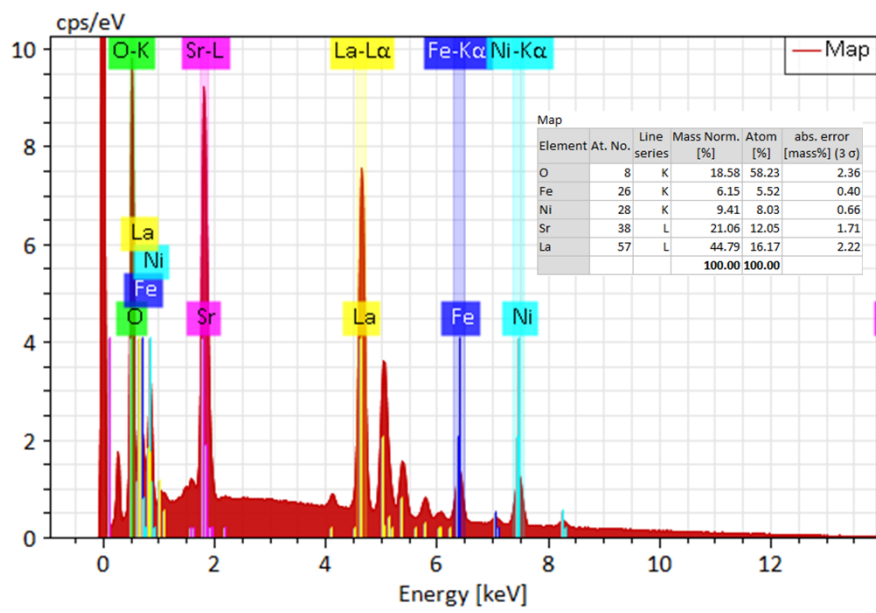

Figure S5. Proportion of each element in LSNF.

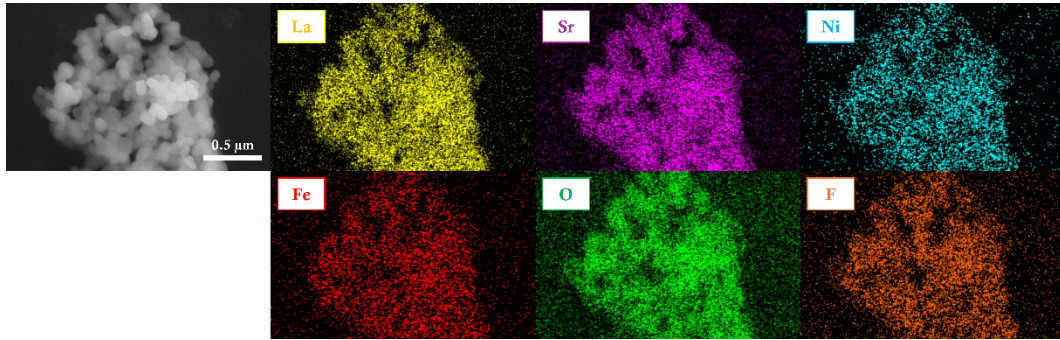

Figure S6. SEM-EDS mapping of LSNF-F.

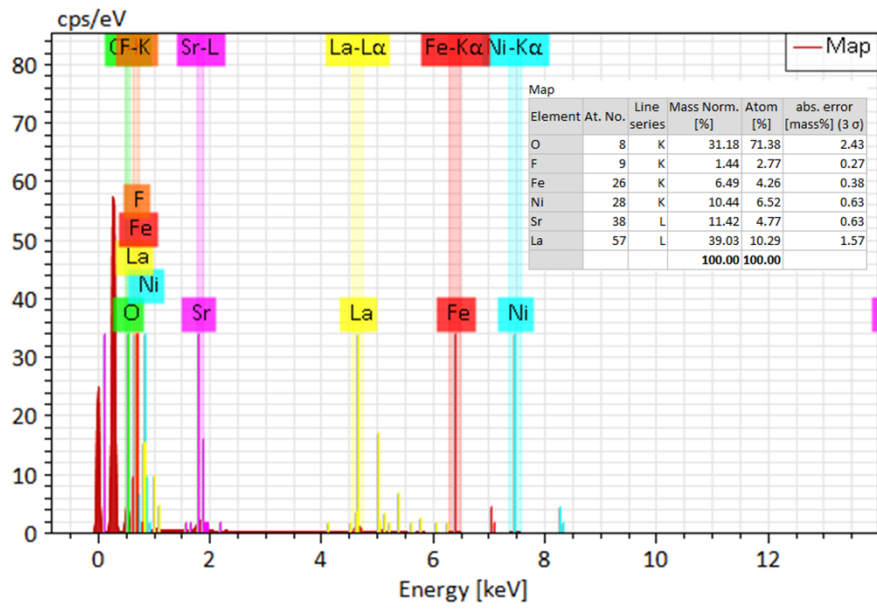

Figure S7. Proportion of each element in LSNF-F.

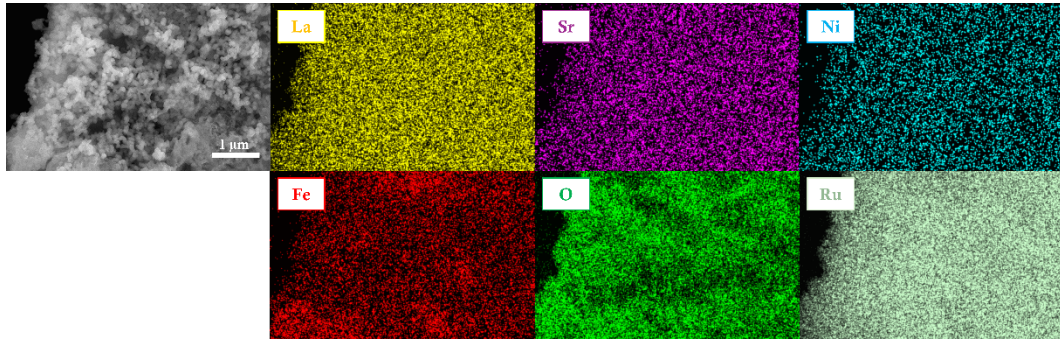

**Figure S8.** SEM-EDS mapping of RuO<sub>x</sub>@LSNF.

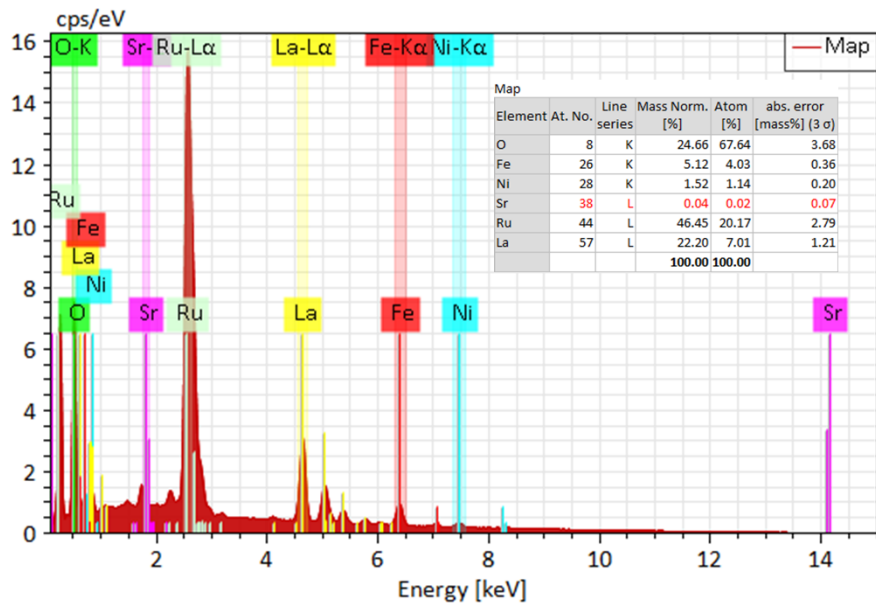

**Figure S9.** Proportion of each element in RuO<sub>x</sub>@LSNF.

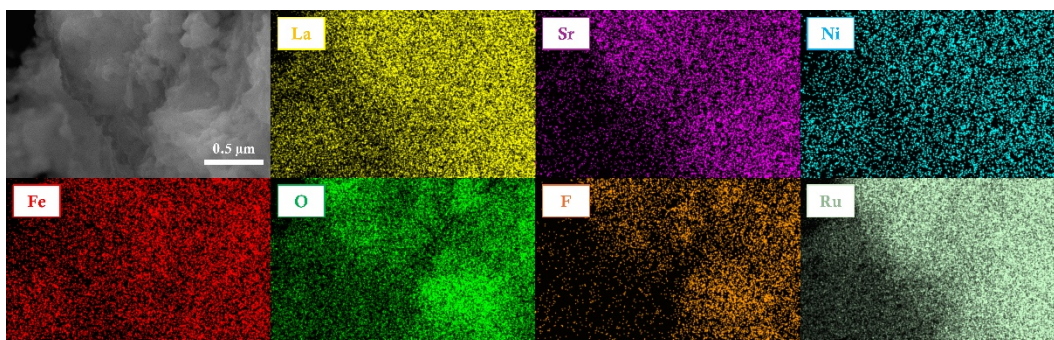

Figure S10. SEM-EDS mapping of RuO<sub>x</sub>@LSNF-F.

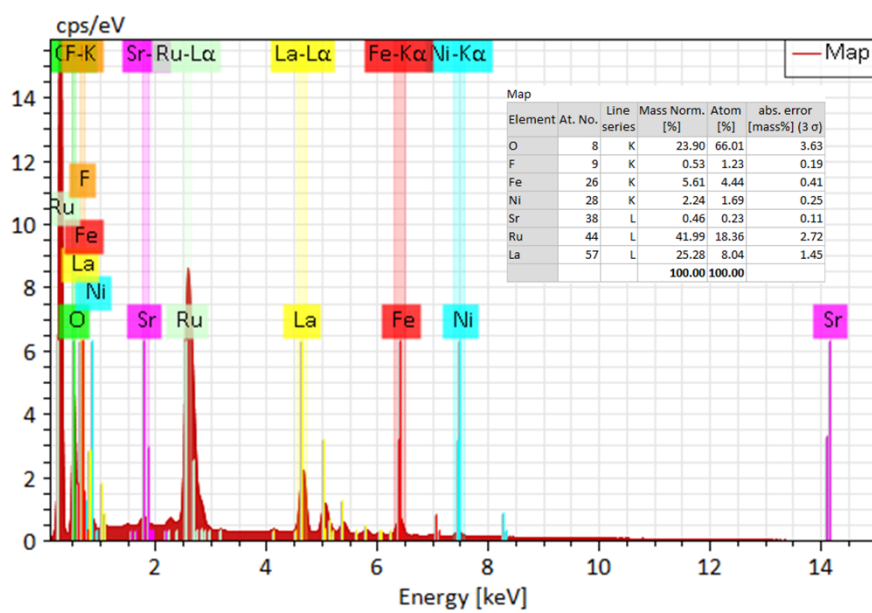

Figure S11. Proportion of each element in RuO<sub>x</sub>@LSNF-F.

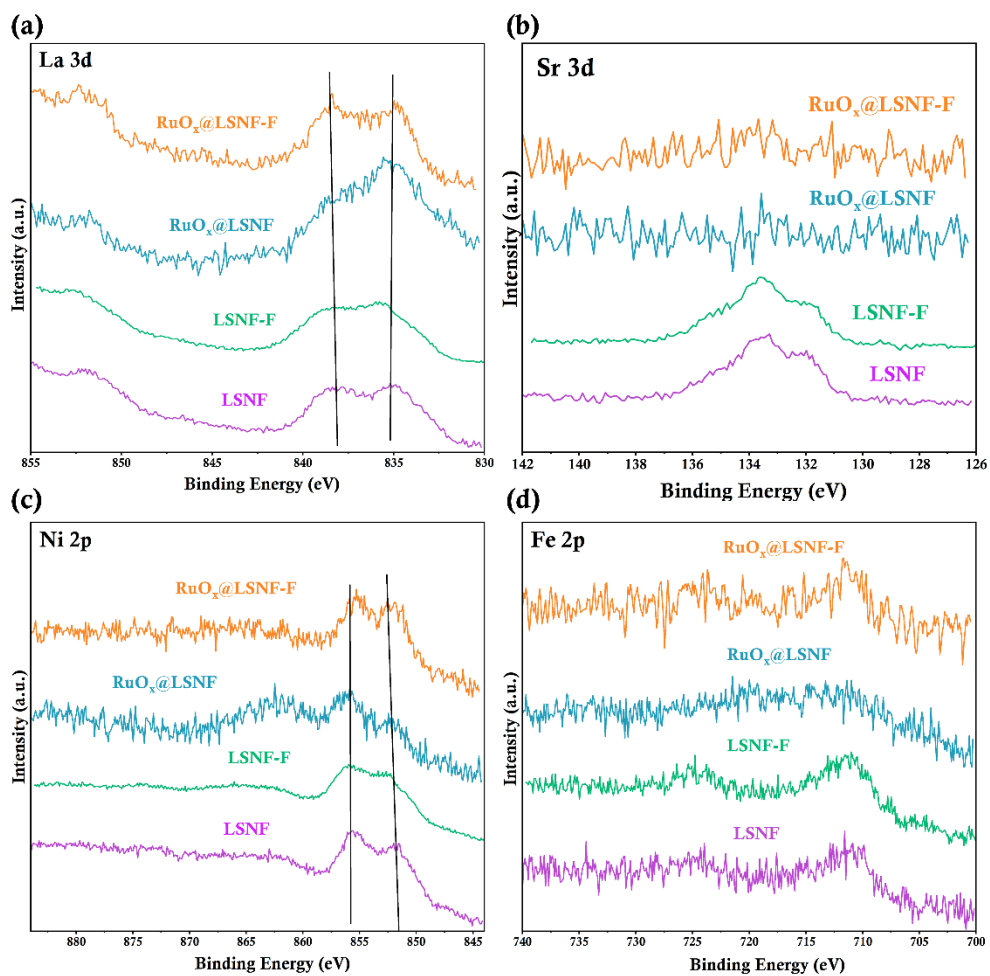

**Figure S12.** (a) La 3d; (b) Sr 3d; (c) Ni 2p; (d) Fe 2p XPS survey spectra of LSNF, LSNF-F, RuO<sub>x</sub>@LSNF, RuO<sub>x</sub>@LSNF-F.

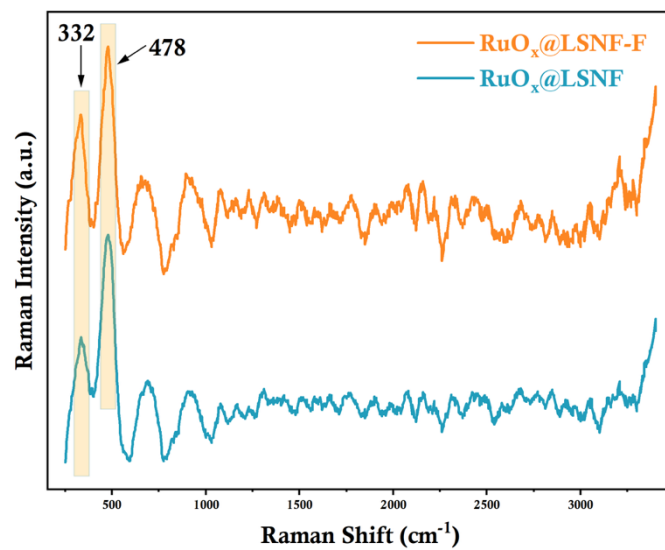

**Figure S13.** Raman shifts of RuO<sub>x</sub>@LSNF-F and RuO<sub>x</sub>@LSNF.

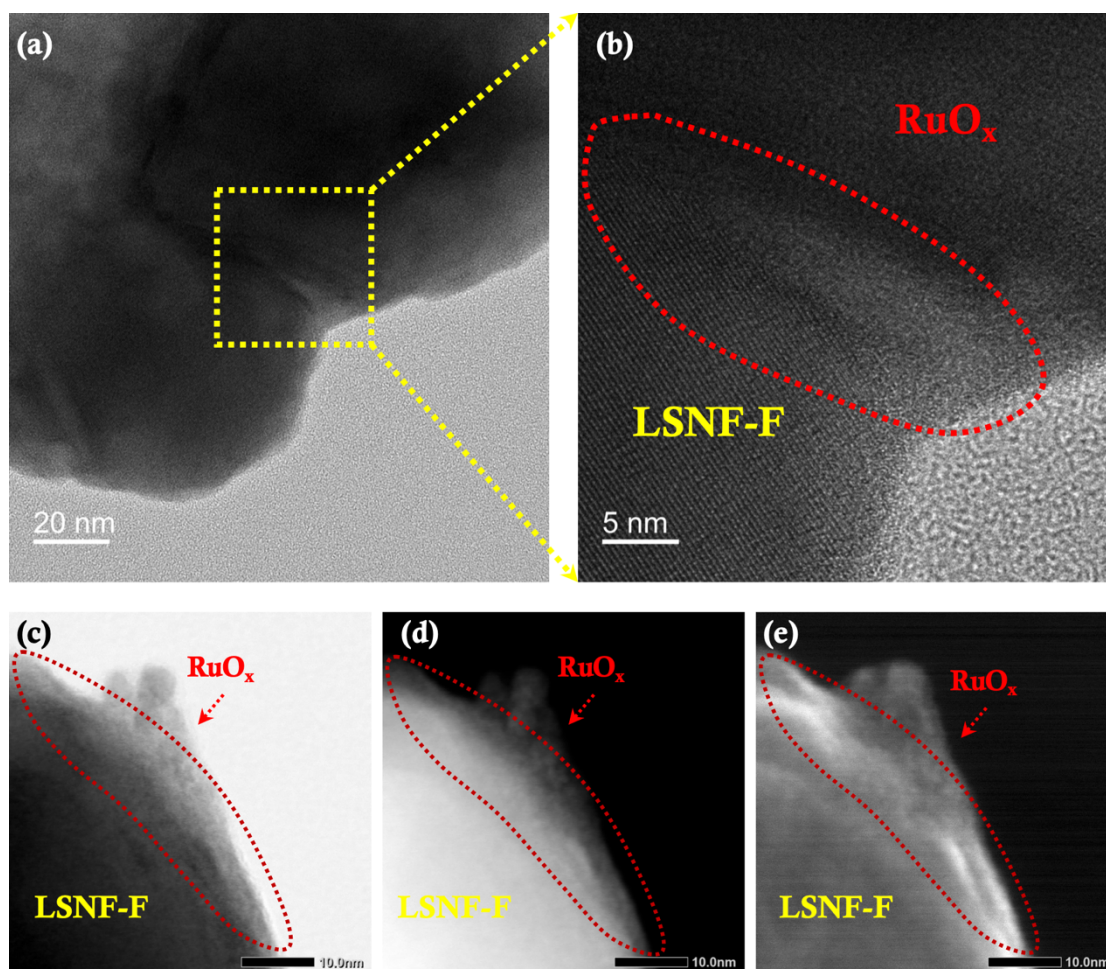

**Figure S14.** Structural characterization of  $\text{RuO}_x@$ LSNF-F. (a) Low-magnification HRTEM image of  $\text{RuO}_x@$ LSNF-F, showing the overall morphology of the catalyst with a uniform particle size. (b) High-magnification HRTEM image of the region marked by the yellow dashed box in (a), clearly revealing a distinct core-shell structure: the inner crystalline LSNF-F support with well-ordered lattice fringes, and the outer amorphous  $\text{RuO}_x$  layer with no observable lattice fringes, confirming the successful loading of amorphous  $\text{RuO}_x$  on the perovskite support. (c)-(e) HAADF-STEM images of  $\text{RuO}_x@$ LSNF-F at different magnifications, further verifying the uniform distribution of the amorphous  $\text{RuO}_x$  overlayer on the surface of the crystalline LSNF-F support.

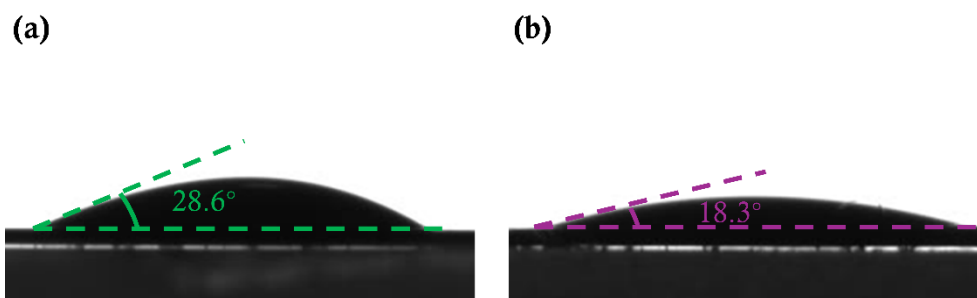

**Figure S15.** Water contact angle of (a) LSNF-F; (b) LSNF.

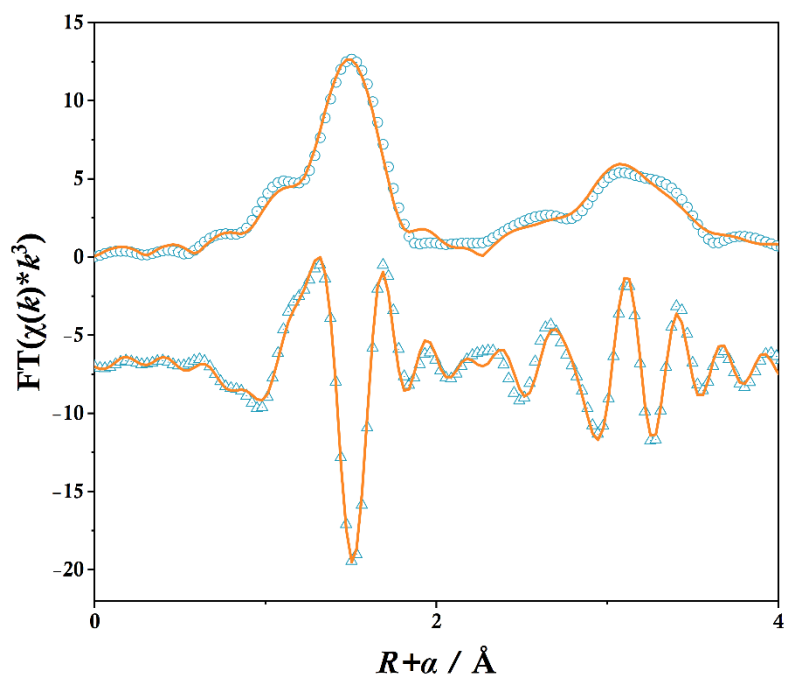

**Figure S16.** Ru K-edge EXAFS (points) and curvefit (line) for RuO<sub>x</sub>@LSNF-F, shown in R-space (FT magnitude and imaginary component). The data are  $k^3$ -weighted and not phase-corrected.

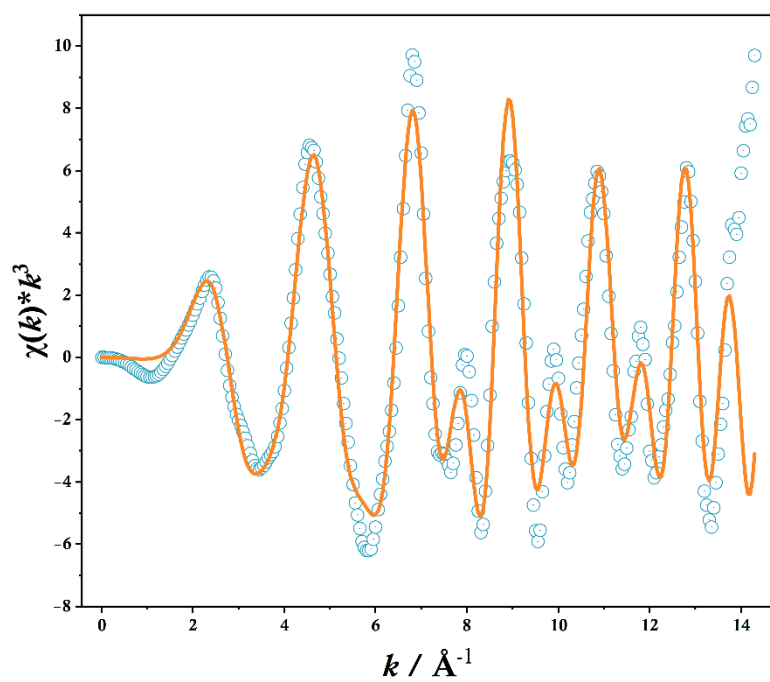

**Figure S17.** Ru K-edge EXAFS (points) and the curvefit (line) for RuO<sub>x</sub>@LSNF-F, shown in  $k^3$ -weighted K-space.

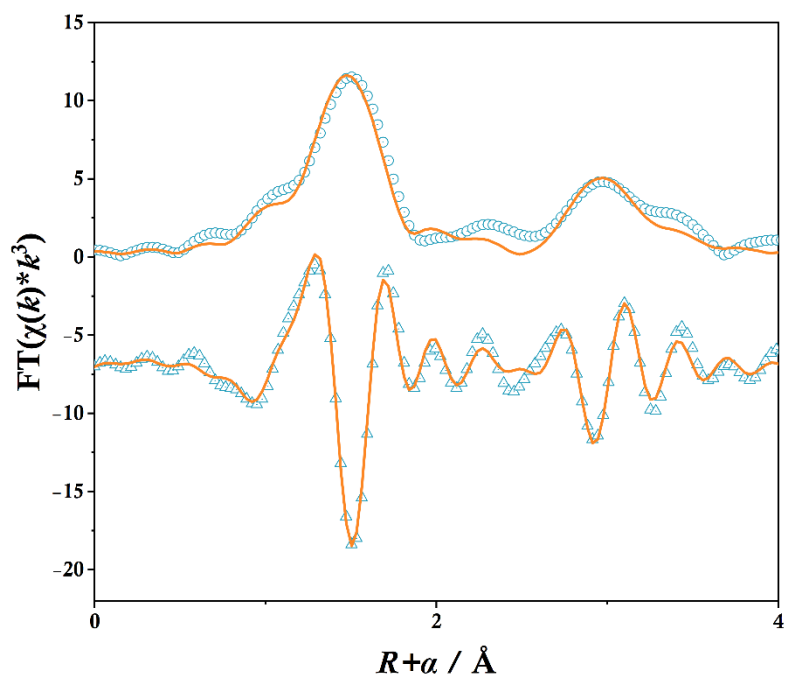

**Figure S18.** Ru K-edge EXAFS (points) and curvefit (line) for RuO<sub>x</sub>@LSNF, shown in R-space (FT magnitude and imaginary component). The data are  $k^3$ -weighted and not phase-corrected.

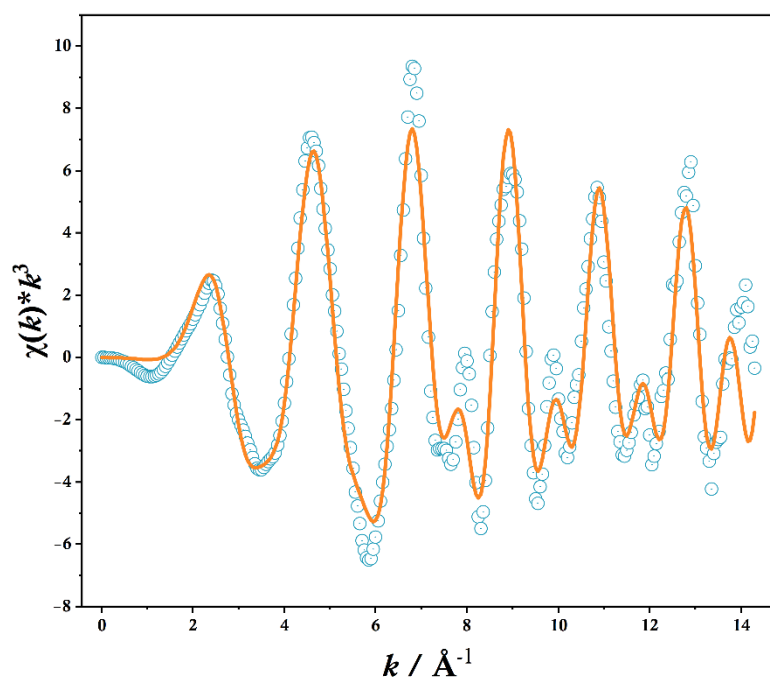

**Figure S19.** Ru K-edge EXAFS (points) and the curvefit (line) for RuO<sub>x</sub>@LSNF, shown in  $k^3$ -weighted K-space.

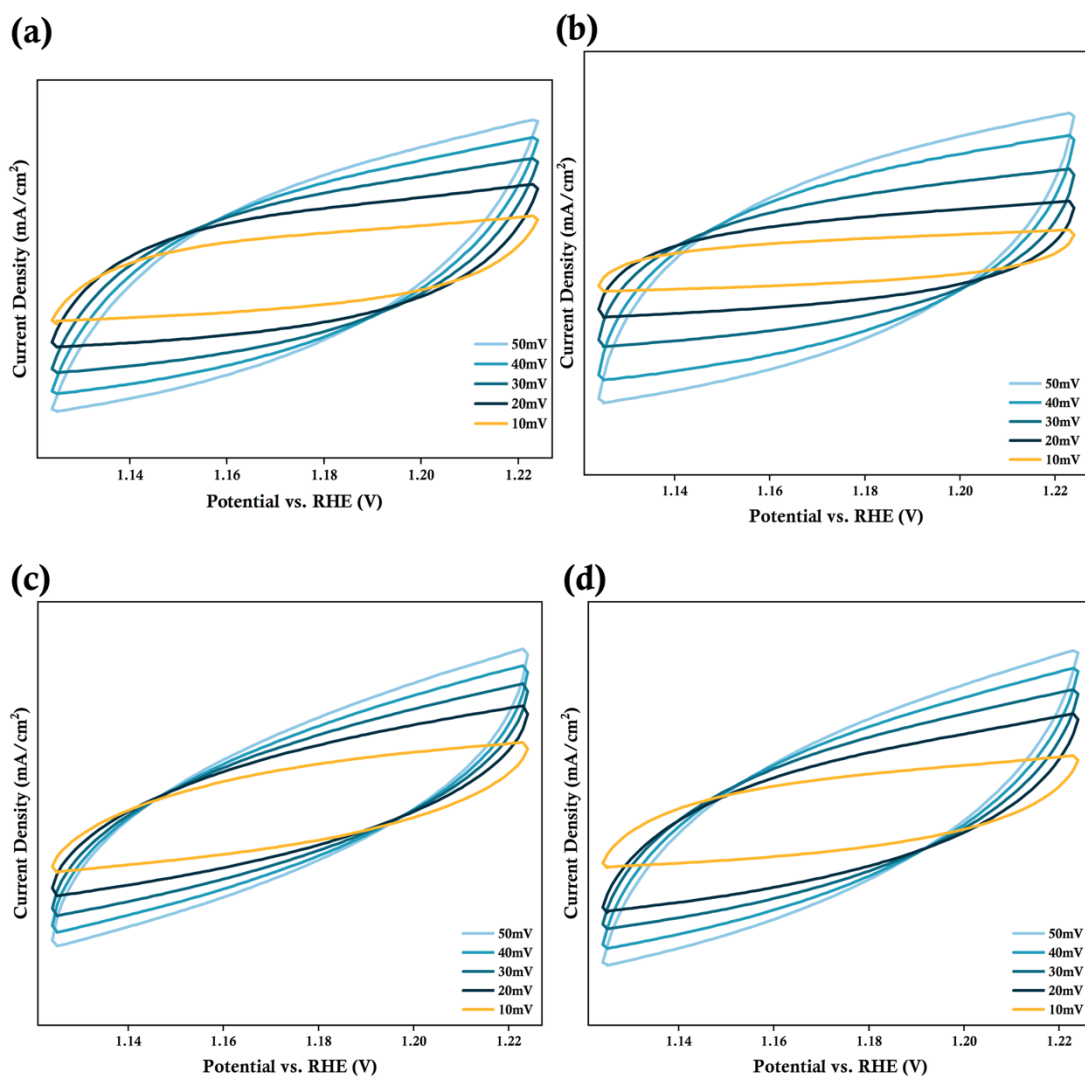

**Figure S20.** CV curves at different scan rates of (a) RuO<sub>x</sub>@LSNF-F; (b) RuO<sub>x</sub>@LSNF; (c) LSNF-F; (d) LSNF.

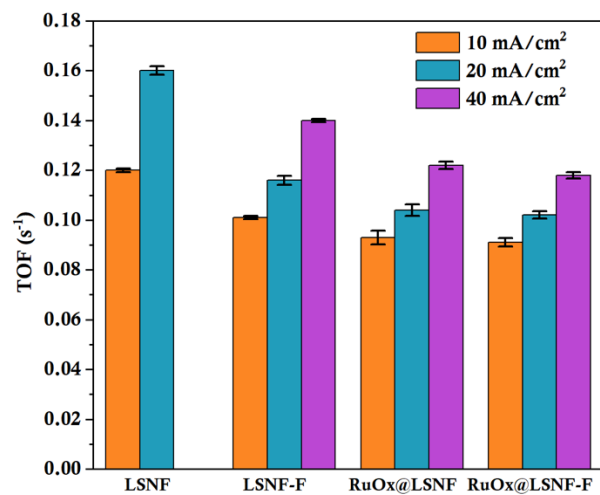

**Figure S21.** TOF values of the catalysts calculated at a fixed current density of 10/20/40 mA/cm<sup>2</sup> based on the Ru molar amount quantified by ICP-MS. The error bars represent the standard deviation (SD) from three independent measurements.

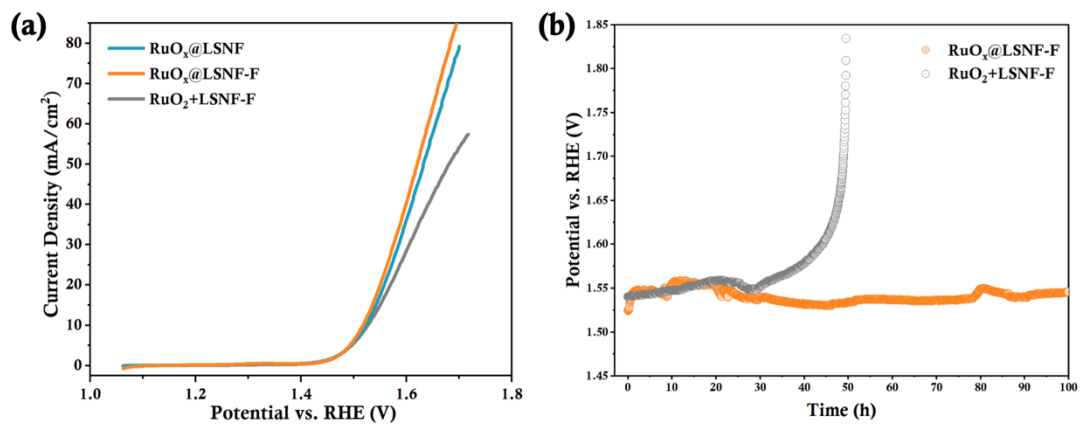

**Figure S22.** Comparison (a) LSV activity and (b) CP time of RuO<sub>x</sub>@LSNF-F, RuO<sub>x</sub>@LSNF and RuO<sub>2</sub>+LSNF-F.

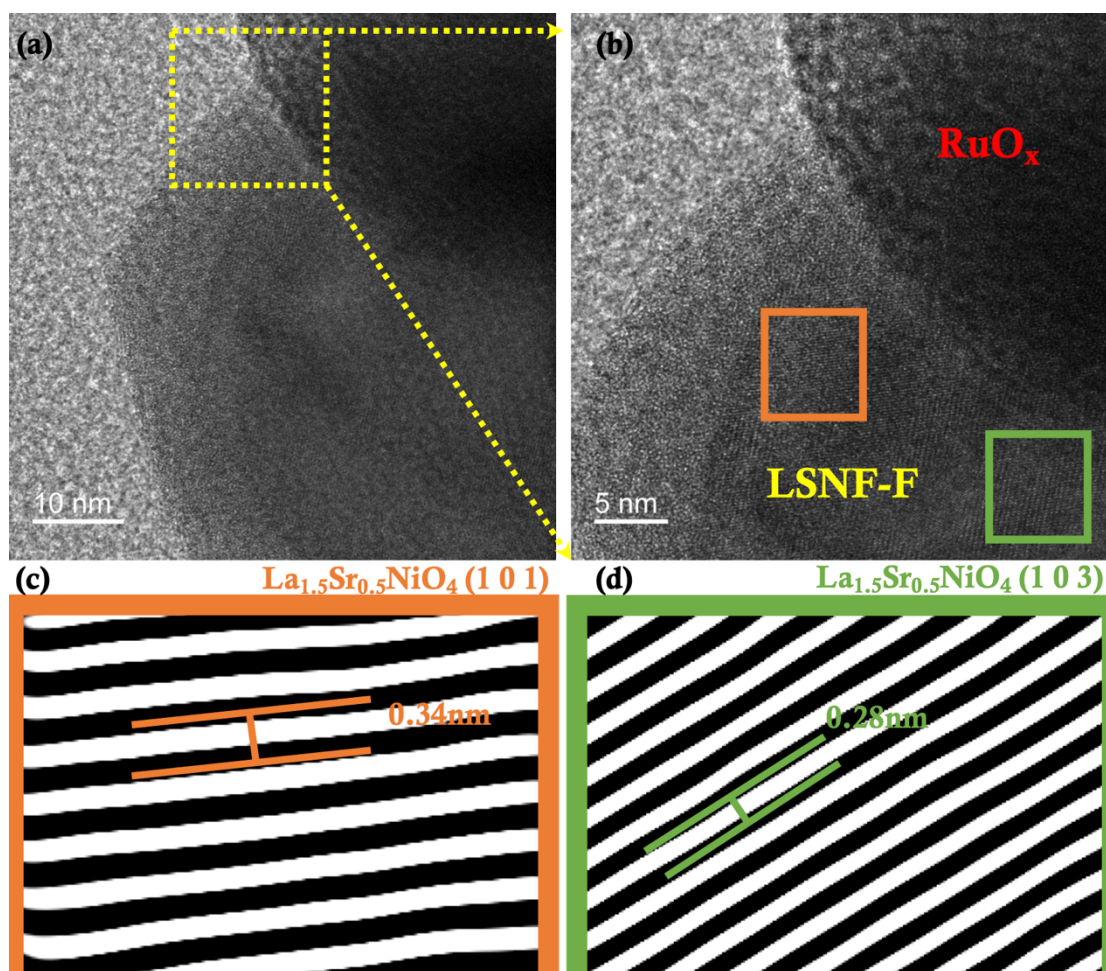

**Figure S23.** Post-93h-durability (a), (b) HRTEM images and (c), (d) local inverse FFT images of RuO<sub>x</sub>@LSNF-F.

**Table S1****ICP-MS test result of RuO<sub>x</sub>@LSNF-F.**

| Ru (wt%) | La (wt%) | Sr (wt%) | Ni (wt%) | Fe (wt%) |
|----------|----------|----------|----------|----------|
| 31.420   | 27.585   | 13.058   | 10.063   | 8.596    |

**Table S2****Curvefit parameters<sup>a</sup> for Ru K-edge EXAFS for RuO<sub>x</sub>@LSNF-F standard**

| Path     | $d^b/\text{Å}$ | $N$     | $R/\text{Å}$ | $\sigma^2/\text{Å}^2$ | $\Delta E/\text{eV}$ | R-factor |
|----------|----------------|---------|--------------|-----------------------|----------------------|----------|
| Ru – O   | 1.986          | 5.3±0.4 | 1.96±0.01    | 0.003±0.001           | -3.09±0.86           | 0.017    |
| Ru – Ru1 | 3.105          | 6.3±0.8 | 3.17±0.02    | 0.002 <sup>c</sup>    |                      |          |
| Ru – Ru2 | 3.539          | 1.1±0.1 | 3.55±0.01    | 0.000 <sup>c</sup>    |                      |          |

<sup>a</sup>  $S_0^2$  was fixed as 1.0. Data ranges:  $2.25 \leq k \leq 13 \text{ Å}^{-1}$ ,  $1.0 \leq R \leq 3.5 \text{ Å}$ . The number of variable parameters is 8, out of a total of 16.9 independent data points. <sup>b</sup> The distances for Ru – O and Ru – Ru are from the crystal structure of RuO<sub>2</sub>. <sup>c</sup> These Debye-Waller factors were constrained as  $\sigma^2(\text{Ru} - \text{Ru1}) = 0.002$  and  $\sigma^2(\text{Ru} - \text{Ru2}) = 0.000$  for reducing the number of variables.

**Table S3****Curvefit parameters<sup>a</sup> for Ru K-edge EXAFS for RuO<sub>x</sub>@LSNF standard**

| Path     | $d^b / \text{\AA}$ | $N$     | $R / \text{\AA}$ | $\sigma^2 / \text{\AA}^2$ | $\Delta E / \text{eV}$ | R-factor |
|----------|--------------------|---------|------------------|---------------------------|------------------------|----------|
| Ru – O   | 1.986              | 5.2±0.5 | 1.96±0.01        | 0.003±0.001               | -1.97±0.8              | 0.017    |
| Ru – Ru1 | 3.105              | 7.9±0.8 | 3.19±0.02        | 0.004 <sup>c</sup>        |                        |          |
| Ru – Ru2 | 3.539              | 1.3±0.2 | 3.55±0.03        | 0.000 <sup>c</sup>        |                        |          |

<sup>a</sup>  $S_0^2$  was fixed as 1.0. Data ranges:  $2.25 \leq k \leq 12 \text{\AA}^{-1}$ ,  $1.0 \leq R \leq 3.2 \text{\AA}$ . The number of variable parameters is 8, out of a total of 13.45 independent data points. <sup>b</sup> The distances for Ru – O and Ru – Ru are from the crystal structure of RuO<sub>2</sub>. <sup>c</sup> These Debye-Waller factors were constrained as  $\sigma^2$  (Ru – Ru1) = 0.004 and  $\sigma^2$  (Ru – Ru2) = 0.000 for reducing the number of variables

**Table S4****Dissolution of RuO<sub>x</sub>@LSNF-F in 1M KOH after 100 h CP test (results from ICP-MS test for 80ml sample used for CP test) and the percentage of dissolved fraction to its original mass (fresh 1M KOH electrolyte has been confirmed by ICP-MS test to be free of La, Sr, Ni, Fe and Ru).**

|                                                           | La    | Sr    | Ni     | Fe    | Ru    |
|-----------------------------------------------------------|-------|-------|--------|-------|-------|
| Concentration of metal elements in the electrolyte (mg/L) | 0.001 | 0.002 | 0.033  | 0.002 | 0.003 |
| Percentage of dissolved fraction                          | 0.58% | 2.45% | 52.41% | 3.72% | 1.52% |

**Table S5****Comparison of overpotentials and CP test hours @ 10mA/cm<sup>2</sup> of reported Ru-based and perovskite-based catalysts in alkaline media.**

|                                         | Electrolyte | Overpotential @ 10mA/cm <sup>2</sup> (mV) | CP test hours (h) | Reference |
|-----------------------------------------|-------------|-------------------------------------------|-------------------|-----------|
| RuO <sub>x</sub> @LSNF-F                | 1M KOH      | 287                                       | 100               | This work |
| RuO <sub>x</sub> @LSNF                  | 1M KOH      | 292                                       | 33                | This work |
| LSNF-F                                  | 1M KOH      | 317                                       | 15                | This work |
| Mn/Ru DSA                               | 1M NaOH     | 300                                       | 14.5              | (1)       |
| RuO <sub>2</sub> com.                   | 1M KOH      | 366                                       | 10                | (2)       |
| Ru <sub>2</sub> Ni <sub>2</sub> SNs/C   | 1M KOH      | 310                                       | 40                | (3)       |
| SFR30                                   | 1M KOH      | 334                                       | 96                | (4)       |
| Ni <sub>1.25</sub> Ru <sub>0.75</sub> P | 1M KOH      | 340                                       | 20                | (5)       |
| PSCR0.05                                | 0.1M KOH    | 321                                       | 10                | (6)       |
| SNCF-NR                                 | 0.1M KOH    | 390                                       | 10                | (7)       |
| LSCF-30                                 | 1M KOH      | 360                                       | 56                | (8)       |

|          |          |     |     |      |
|----------|----------|-----|-----|------|
| r-LSCN-P | 0.1M KOH | 410 | 14  | (9)  |
| SCFM10   | 1M KOH   | 310 | 100 | (10) |

## References

- (1) Browne, M. P.; Nolan, H.; Duesberg, G. S.; Colavita, P. E.; Lyons, M. E. G. Low-Overpotential High-Activity Mixed Manganese and Ruthenium Oxide Electrocatalysts for Oxygen Evolution Reaction in Alkaline Media. *ACS Catalysis* **2016**, *6* (4), 2408–2415. <https://doi.org/10.1021/acscatal.5b02069>.
- (2) Gao, M.-R.; Cao, X.; Gao, Q.; Xu, Y.-F.; Zheng, Y.-R.; Jiang, J.; Yu, S.-H. Nitrogen-Doped Graphene Supported CoSe<sub>2</sub> Nanobelt Composite Catalyst for Efficient Water Oxidation. *ACS Nano* **2014**, *8* (4), 3970–3978. <https://doi.org/10.1021/nn500880v>.
- (3) Ding, J.; Shao, Q.; Feng, Y.; Huang, X. Ruthenium-Nickel Sandwiched Nanoplates for Efficient Water Splitting Electrocatalysis. *Nano Energy* **2018**, *47*, 1–7. <https://doi.org/10.1016/j.nanoen.2018.02.017>.
- (4) Zhang, W.; Xue, M.; Zhang, X.; Si, C.; Tai, C.; Lu, Q.; Wei, M.; Han, X.; Ma, J.; Chen, S.; Guo, E. Boosting Oxygen/Hydrogen Evolution Catalysis via Ruthenium Doping in Perovskite Oxide for Efficient Alkaline Water Splitting. *Applied Surface Science* **2024**, *664*, 160278. <https://doi.org/10.1016/j.apsusc.2024.160278>.
- (5) Liyanage, D. R.; Li, D.; Cheek, Q. B.; Baydoun, H.; Brock, S. L. Synthesis and Oxygen Evolution Reaction (OER) Catalytic Performance of Ni<sub>2-x</sub>Ru<sub>x</sub>P Nanocrystals: Enhancing Activity by Dilution of the Noble Metal. *Journal of Materials Chemistry A* **2017**, *5* (33), 17609–17618. <https://doi.org/10.1039/c7ta05353c>.
- (6) Zhao, Y.-N.; Liu, C.; Xu, S.; Min, S.; Wang, W.; Mitsuzaki, N.; Chen, Z. A/B-Site Management Strategy to Boost Electrocatalytic Overall Water Splitting on Perovskite Oxides in an Alkaline Medium. *Inorganic Chemistry* **2023**, *62* (31), 12590–12599. <https://doi.org/10.1021/acs.inorgchem.3c01965>.
- (7) Zhu, Y.; Zhou, W.; Zhong, Y.; Zhong, Q.; Chen, X.; Liu, M.; Zhou, W. A Perovskite Nanorod as Bifunctional Electrocatalyst for Overall Water Splitting. *Advanced Energy Materials* **2017**, *7* (8), 1602122–1602122. <https://doi.org/10.1002/aenm.201602122>.
- (8) Zong, R.; Fang, Y.; Zhu, C.; Zhang, X.; Wu, L.; Hou, X.; Tao, Y.; Shao, J. Surface Defect Engineering on Perovskite Oxides as Efficient Bifunctional Electrocatalysts for Water Splitting. *ACS Applied Materials & Interfaces* **2021**, *13* (36), 42852–42860. <https://doi.org/10.1021/acsami.1c11895>.
- (9) Wang, Y.; Wang, Z.; Jin, C.; Li, C.; Li, X.; Li, Y.; Yang, R.; Liu, M. Enhanced Overall Water Electrolysis on a Bifunctional Perovskite Oxide through Interfacial Engineering. *Electrochimica Acta* **2019**, *318*, 120–129. <https://doi.org/10.1016/j.electacta.2019.06.073>.
- (10) Zhang, W.; Si, C.; Lu, Q.; Wei, M.; Han, X.; Chen, S.; Guo, E. Mo-Doped SrCo<sub>0.5</sub>Fe<sub>0.5</sub>O<sub>3-δ</sub> Perovskite Oxides as Bifunctional Electrocatalysts for Highly Efficient Overall Water Splitting. *Electrochimica Acta* **2024**, *491*, 144323. <https://doi.org/10.1016/j.electacta.2024.144323>.
